# Supplementary material
Source: Springer Nature journal article supplement (https://www.springermedizin.de/resource/supplementary/12874_2011_855_MOESM5_ESM.pdf/9432658)
Supplement: MOESM5 [file 9432658]

▪ **Search for electronic DB** (n= 64)

(date: 1~3 July 2010)

- OvidMedline
- OvidEmbase

▪ **Search for domestic DB** (n = 274)

(date: 13~14 July 2010)

- KoreaMed
- Kmbase
- NDSL
- KISTI
- KISS

Excluding

Irrelevant articles or  
duplication

38 full-text articles assessed

for eligibility

16 full-text articles excluded,  
with reasons:

- not investigated research  
question for nursing  
intervention (n = 7)
- Narrative review (n = 9)

22 systematic reviews and meta-analyses

included in quality
